# Supplementary material for: Metal induced selectivity in phosphate ion binding in E9 DNase
Source: Royal Society of Chemistry journal article supplement (doi:10.1039/b415709e), 2005-01-01
Supplement: b415709e.pdf [file b415709e.pdf]

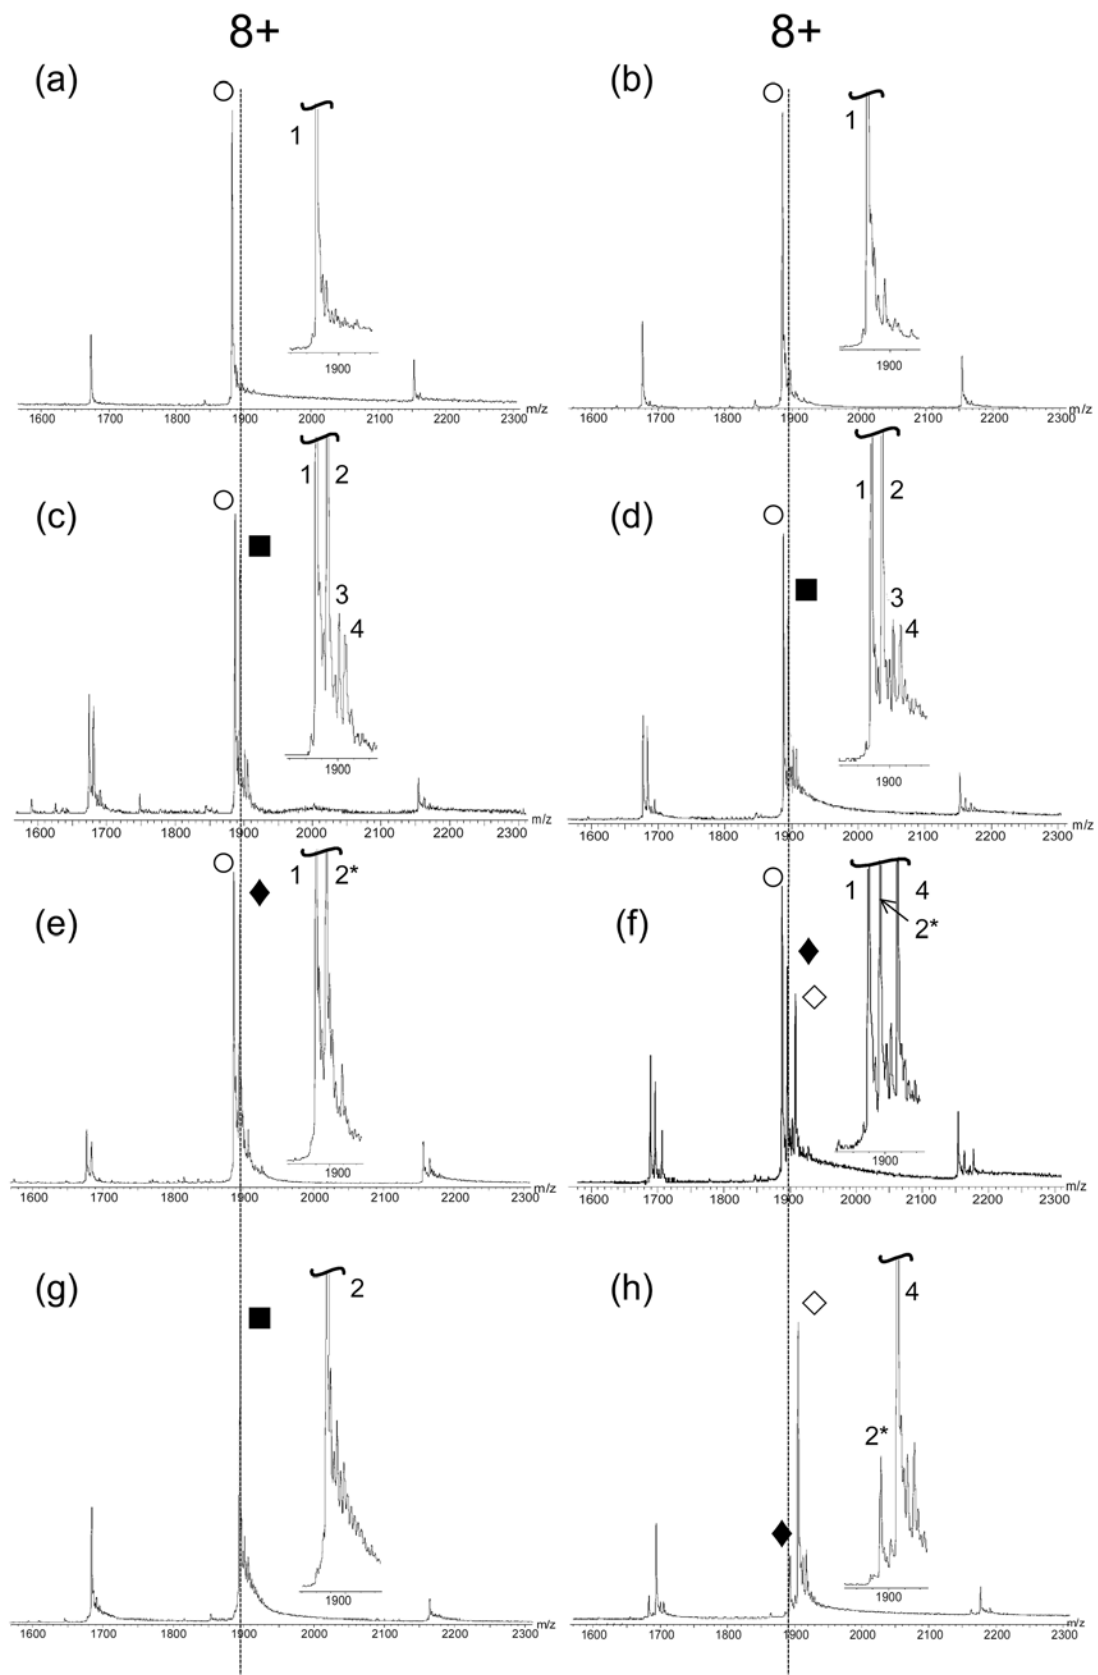

**Figure S1.** Electrospray ionization mass spectra of the colicin E9 DNase system sprayed under gentle ionization and pseudo-native conditions. Time-of-flight electrospray ionization mass spectra were recorded on a Micromass LC-T mass spectrometer (Manchester, U.K.) operating in the positive ion mode. Prior to analysis a 600-3000 m/z scale was calibrated with CsI (2 mg/ml) in isopropanol/water (1:1). Samples were introduced via a nanoflow electrospray source. All samples were dissolved in 50 mM aqueous ammonium acetate solutions at pH 7.4. In all experiments the protein concentration was 10  $\mu$ M. The nanospray needle potential was typically set to 1200 V and the cone voltage to 30 V. The mass spectrometer was operated without source heating.

ESI-MS spectra of:

- (a) apo E9 DNase (*i.e.* metal-free).
- (b) apo E9 DNase in the presence of 10  $\mu$ M phosphate (10  $\mu$ M).
- (c) E9 DNase in the presence of 5  $\mu$ M Ni<sup>2+</sup>.
- (d) E9 DNase in the presence of 5  $\mu$ M Ni<sup>2+</sup> and 10  $\mu$ M phosphate.
- (e) E9 DNase in the presence of 5  $\mu$ M Zn<sup>2+</sup>.
- (f) E9 DNase in the presence of 5  $\mu$ M Zn<sup>2+</sup> and 10  $\mu$ M phosphate.
- (g) E9 DNase in the presence of 30  $\mu$ M Ni<sup>2+</sup> and 30  $\mu$ M phosphate.
- (h) E9 DNase in the presence of 30  $\mu$ M Zn<sup>2+</sup> and 30  $\mu$ M phosphate.

In all these spectra ions are observed at charge states 9 (at m/z values of approximately 1700), 8 (at m/z values of approximately 1900) and 7 (at m/z values of approximately 2150). Ion peaks indicating the apo E9 DNase are marked by (○). Ion peaks representing E9-Zn<sup>2+</sup> are indicated by (◆). Ion peaks indicating E9-Ni<sup>2+</sup> are highlighted by (■). Ion peaks represented by (◇) indicating E9-Zn<sup>2+</sup>-PO<sub>4</sub><sup>3-</sup>. In the insets are shown detailed spectra zoomed in on the 8-charged ions. The numberings used in these insets relate to **1**: apo-E9, mass = 15088.3  $\pm$  0.3, **2**: E9-Ni<sup>2+</sup> mass = 15144.3  $\pm$  1.0, **2\***: E9-Zn<sup>2+</sup> mass = 15151.5  $\pm$  1.2, **3**: E9-Ni<sup>2+</sup>-acetate, mass = 15202.7  $\pm$  1.2. **4**: E9-Zn<sup>2+</sup>-phosphate mass = 15248.8  $\pm$  0.9. The non-specific anion binding of the acetate originates from the ammonium acetate buffer, which is present at a concentration of 50 mM, whereas the specific binding of the phosphate anion originates from the phosphate added at a concentration of 10 to 30  $\mu$ M.
